# Supplementary material for: Glutathione supplementation suppresses muscle fatigue induced by prolonged exercise via improved aerobic metabolism
Source: Springer Nature journal article supplement (doi:10.1186/s12970-015-0067-x), 2015-02-05
Supplement: 12970_2015_67_MOESM1_ESM.pdf [file 12970_2015_67_MOESM1_ESM.pdf]

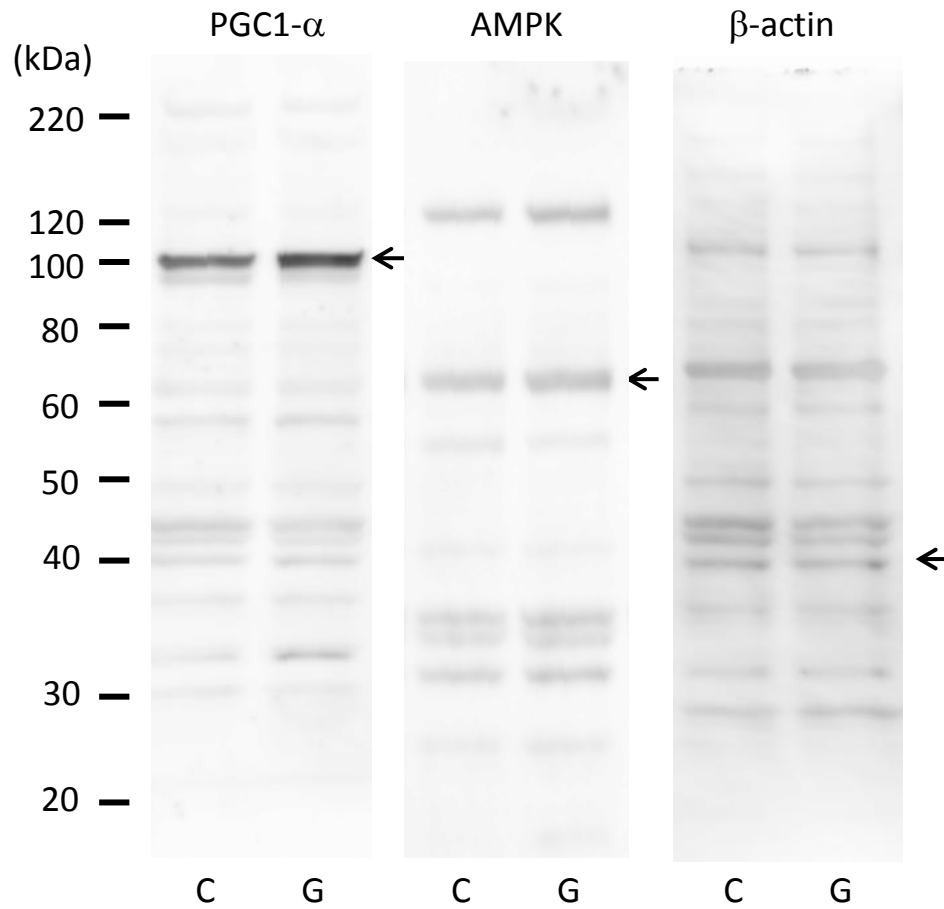

Supplementary figure 1. Images of western blotting for PGC-1 $\alpha$ , AMPK, and  $\beta$ -actin in control (C) and glutathione (G) groups.
